# Supplementary material
Source: MDPI journal article supplement (https://www.mdpi.com/2071-1050/9/10/1807)
Supplement: s1 [file s1]

Supplementary materials:

**Supplementary Materials:**

Table S1: Metrics for large scale hydropower plants.

| LARGE SCALE HYDROPOWER |                 |                     |                         |                            |                   |                          |                        |                            |                          |                    |
|------------------------|-----------------|---------------------|-------------------------|----------------------------|-------------------|--------------------------|------------------------|----------------------------|--------------------------|--------------------|
| Plant                  | Capacity (MW)   | Maximum flow (m3/s) | Annual production (Mwh) | Hydraulic Pumping Capacity | Reservoir         | Reservoir capacity (hm3) | Reservoir surface (m2) | Lenth of river stretch (m) | Water withdrawal (m3)    | Evaporation (m3)   |
| Agavanzal              | 24.09           | 60.00               | 52,210.00               | NO                         | Agavanzal         | 35.90                    | 3,650,000.00           | 17,446.00                  | 468,115,063.72           | 3,034,000          |
| Aguilar de Campoo      | 10.23           | 24                  | 20,600.00               | NO                         | Aguilar de Campoo | 247.23                   | 16,460,000.00          | 15,000                     | 173,982,404.69           | 7,440,000          |
| Aldeávila I            | 855.00          | 625.80              | 2,480,700.00            | NO                         | Aldeávila         | 114.87                   | 4,060,000.00           | 42,287                     | 6,536,513,936.84         | 4,330,000          |
| Aldeávila II           | 408.00          | 340.00              | 195,000.00              | YES                        | Aldeávila         | -----                    | -----                  | 1,000.00                   | 585,000,000.00           | -----              |
| Camporredondo          | 14.77           | 22.00               | 26,698.12               | NO                         | Camporredondo     | 69.79                    | 4,052,000.00           | 15,038                     | 143,141,807.96           | 1,290,000          |
| Castro I               | 87.58           | 270.00              | 221,156.40              | NO                         | Castro            | 27.50                    | 1,573,000.00           | 25,558.00                  | 2,454,375,465.84         | 1,860,000          |
| Castro II              | 120.20          | 340.00              | 300,000.00              | NO                         | Castro            | -----                    | -----                  | 900.00                     | 3,054,908,485.86         | -----              |
| Cernadilla             | 30.00           | 60.00               | 55,900.00               | NO                         | Cernadilla        | 255.54                   | 13,419,000.00          | 39,411.00                  | 402,480,000.00           | 8,424,000          |
| Compuerto              | 20.00           | 24.00               | 51,700.00               | NO                         | Compuerto         | 95.00                    | 3,807,300.00           | 21,514.00                  | 223,344,000.00           | 1,160,000          |
| La Remolina            | 85.00           | 106.00              | 97,630.00               | NO                         | Riaño             | 651.14                   | 20,679,000.00          | 42,600.00                  | 438,301,270.59           | 6,940,000          |
| Moncabril              | 35.96           | 8.00                | 91,320.44               | NO                         | Porto & Playa     | 25.88                    | 2,766,000.00           | 17,187.00                  | 73,137,612.01            | 1,515,768          |
| Porma                  | 16.60           | 30.00               | 62,800.00               | NO                         | Porma             | 317.83                   | 11,825,200.00          | 29,245.00                  | 408,578,313.25           | 6,940,000          |
| Ricobayo I             | 183.30          | 240.00              | 684,000.00              | NO                         | Ricobayo          | 1,178.88                 | 59,179,900.00          | 164,775.00                 | 3,224,091,653.03         | 31,890,000         |
| Ricobayo II            | 135.00          | 210.00              | 130,000.00              | NO                         | Ricobayo          | -----                    | -----                  | 329.00                     | 728,000,000.00           | -----              |
| San Isidoro            | 38.40           | 40.80               | 62,100.30               | NO                         | Barrios de Luna   | 308.00                   | 11,300,000.00          | 40,000.00                  | 237,533,647.50           | 5,240,000          |
| Santa Teresa           | 19.88           | 50.00               | 69,950.00               | NO                         | Santa Teresa      | 496.00                   | 26,239,200.00          | 37,360.00                  | 633,350,100.60           | 16,240,000         |
| Saucelle I             | 285.00          | 475.20              | 600,000.00              | NO                         | Saucelle          | 181.37                   | 6,031,000.00           | 31,935.00                  | 3,601,515,789.47         | 7,340,000          |
| Saucelle II            | 252.00          | 523.00              | 488,000.00              | NO                         | Saucelle          | -----                    | -----                  | 1,501.00                   | 3,646,057,142.86         | -----              |
| Valparaíso             | 60.00           | 158.00              | 60,000.00               | YES                        | Valparaíso        | 162.37                   | 12,559,000.00          | 49,180.00                  | 568,800,000.00           | 10,354,000         |
| Villalba               | 12.60           | 17.00               | 52,000.00               | NO                         | Velilla de Guardo | 1.81                     | 290,000.00             | 14,440.00                  | 252,571,428.57           | 204,000            |
| Villalcampo I          | 96.00           | 303.00              | 119,520.00              | NO                         | Villalcampo       | 66.00                    | 2,253,000.00           | 22,400                     | 1,358,046,000.00         | 4,140,000          |
| Villalcampo II         | 110.00          | 340.00              | 137,000.00              | NO                         | Villalcampo       | -----                    | -----                  | 573                        | 1,524,436,363.64         | -----              |
| Villarino-Almendra     | 829.75          | 232.50              | 1,930,000.00            | YES                        | Almendra          | 2,586.34                 | 84,615,300.00          | 122,600.00                 | 1,946,863,513.11         | 50,520,000         |
| <b>TOTAL</b>           | <b>3,729.37</b> | <b>4,499.30</b>     | <b>7,988,285.25</b>     |                            |                   | <b>6,821.46</b>          | <b>284,758,900.00</b>  | <b>752,279.00</b>          | <b>32,683,143,999.54</b> | <b>168,861,768</b> |

Table S2: Metrics for small scale hydropower plants

| SMALL SCALE HYDROPOWER                 |       |               |                     |                         |                            |                               |                          |                        |                            |                       |                  |
|----------------------------------------|-------|---------------|---------------------|-------------------------|----------------------------|-------------------------------|--------------------------|------------------------|----------------------------|-----------------------|------------------|
| Plant                                  | Type  | Capacity (kW) | Maximum flow (m3/s) | Annual production (kwh) | Hydraulic Pumping Capacity | Reservoir                     | Reservoir capacity (hm3) | Reservoir surface (m2) | Lenth of river stretch (m) | Water withdrawal (m3) | Evaporation (m3) |
| Acera de la Vega                       | Canal | 8,670         | 17                  | 34,200,000              | NO                         | Small dam                     | 1.80                     | 290,000                | 11,350                     | 241,411,764.71        | 177,190          |
| Agueda                                 | RHP   | 4,980         | 20                  | 9,840,000               | NO                         | Agueda Reservoir              | 22                       | 1,770,000              | 13,333                     | 142,265,060.24        | 1,610,000        |
| Aguilarejo                             | RoR   | 1618          | 60                  | 5,693,267               | NO                         | weir                          | -----                    | -----                  | 33.28                      | 760,040,588.38        |                  |
| Alar                                   | RoR   | 406           | 20                  | 1,642,871               | NO                         | weir                          | -----                    | -----                  | 370                        | 291,346,581.28        |                  |
| Alcoba de la Ribera o Alcoba           | canal | 9,600         | 38                  | 23,190,000              | NO                         | weir                          | -----                    | -----                  | 9,400                      | 330,457,500.00        |                  |
| Alcozar                                | RoR   | 4480          | 30                  | 2,826,068               | NO                         | weir                          | -----                    | -----                  | 150                        | 68,128,425.00         |                  |
| Almenara                               | RoR   | 402           | 14                  | 1,620,041               | NO                         | Small dam                     | -----                    | 14,300                 | 528                        | 195,855,702.99        | 5,220            |
| Ambasaguas de Curueño                  | RoR   | 1,990         | 9                   | 5,969,643               | NO                         | weir                          | -----                    | -----                  | 4436                       | 99,354,058.37         |                  |
| Aranda I                               | RoR   | 184           | 8                   | 2,848,679               | NO                         | weir                          | -----                    | -----                  | 115                        | 445,880,191.30        |                  |
| Aranda II                              | RoR   | 500           | 20                  | 2,465,657               | NO                         | weir                          | -----                    | -----                  | 107                        | 355,054,608.00        |                  |
| Arlanzón                               | RHP   | 1,200         | 4                   | 4,463,000               | NO                         | Arlanzón Reservoir            | 23.38                    | 1,274,400              | 2,366                      | 53,556,000.00         | 660,000          |
| Arroyo de Los Pozos                    | RoR   | 1,074         | 0                   | 706,692                 | NO                         | weir                          | -----                    | -----                  | 1,384                      | 592,200.00            |                  |
| Ausín o Molino de Ausín                | RoR   | 1,882         | 60                  | 5,455,394               | NO                         | weir                          | -----                    | -----                  | 266                        | 626,123,859.72        |                  |
| Barrios de Luna                        | RHP   | 400           | 1                   | 2,515,200.00            | NO                         | Barrios de Luna Reservoir     | 0.31                     | 11,300,000             | 17460                      | 11,318,400.00         | 5,240,000        |
| Bocos                                  | RoR   | 1438          | 30                  | 3,517,436               | NO                         | weir                          | -----                    | -----                  | 50                         | 264,174,609.18        |                  |
| Boñar I o Boñar                        | RoR   | 2,434         | 18                  | 12,290,000              | NO                         | weir                          | -----                    | -----                  | 3,650                      | 327,194,741.17        |                  |
| Bubones                                | RoR   | 1468          | 20                  | 3,209,352               | NO                         | weir                          | -----                    | -----                  | 2,000                      | 157,406,910.08        |                  |
| Burgomillodo                           | RHP   | 3233          | 9                   | 3,588,586               | NO                         | Burgomillodo Reservoir        | 15.00                    | 940,000                | 9569                       | 36,562,951.70         | 930,000          |
| Camposolillo                           | RoR   | 1,700         | 10                  | 2,507,328               | NO                         | weir                          | -----                    | -----                  | 1,369                      | 53,096,357.65         |                  |
| Canal de Almazán                       | RoR   | 1,576         | 14                  | 1,822,436               | NO                         | weir                          | -----                    | -----                  | 79                         | 58,280,948.22         |                  |
| Casares                                | RoR   | 1,970         | 3                   | 2,920,000               | NO                         | Casares Reservoir             | 37.00                    | 2,800,000              | 3,010                      | 16,008,121.83         | 1,770,000        |
| Castro de Las Cogotas o Las Cogotas    | RHP   | 5,251         | 10                  | 13,800,000              | NO                         | Las Cogotas Reservoir         | 58.60                    | 4,000,000              | 8,630                      | 94,610,550.37         | 2,362,000        |
| Cimanes del Tejar o Cimanes            | canal | 9,600         | 38                  | 25,560,000.00           | NO                         | weir                          | -----                    | -----                  | 9,600                      | 364,230,000.00        |                  |
| Cubo de Don Sancho                     | RoR   | 49            | 20                  | 65,817                  | NO                         | Small dam                     | -----                    | 35,000                 | 300                        | 96,710,693.88         |                  |
| Cuerda del Pozo                        | RHP   | 6,035.20      | 21                  | 8,500,000               | NO                         | Cuerda del Pozo Reservoir     | 229.00                   | 21,760,000             | 21,760                     | 103,940,217.39        | 11,000,000       |
| El Chorro                              | RoR   | 1,024         | 1                   | 4,230,000               | NO                         | El Duque Reservoir            | 2.50                     | 270,000                | 1,846                      | 13,383,984.38         | 117,180          |
| El Cabildo                             | RoR   | 606           | 27                  | 1,867,624               | NO                         | weir                          | -----                    | -----                  | 180                        | 296,408,570.99        |                  |
| El Cardiel                             | RoR   | 260           | 6                   | 782,457                 | NO                         | weir                          | -----                    | -----                  | 470                        | 65,004,120.00         |                  |
| El Hoyo                                | RoR   | 3,582         | 105                 | 5,867,695               | NO                         | weir                          | -----                    | -----                  | 1,410                      | 619,203,994.97        |                  |
| El Martinete                           | RoR   | 639           | 4                   | 758,493                 | NO                         | weir                          | -----                    | -----                  | 682                        | 17,092,800.00         |                  |
| El Pisón                               | RoR   | 75            | 3                   | 94,114                  | NO                         | weir                          | -----                    | -----                  | 377                        | 11,438,239.10         |                  |
| El Tejado                              | RoR   | 662           | 24                  | 2,517,349               | NO                         | weir                          | -----                    | -----                  | 295                        | 328,548,268.28        |                  |
| El Vergueral                           | RoR   | 515           | 20                  | 42,224,080              | NO                         | weir                          | -----                    | -----                  | 450                        | 5,903,172,349.51      |                  |
| Esclusa 14 Canal Castilla o Esclusa 14 | canal | 237           | 8                   | 950,000                 | NO                         | canal                         | -----                    | -----                  | 124                        | 112,556,962.03        |                  |
| Esclusa 38                             | canal | 60            | 2                   | 400,396                 | NO                         | canal                         | -----                    | -----                  | 76                         | 47,567,044.80         |                  |
| Esclusa cuatro o La Cuarta             | canal | 70            | 1                   | 441,396                 | NO                         | canal                         | -----                    | -----                  | 76                         | 22,700,365.71         |                  |
| Espinosa de la Ribera o Espinosa       | canal | 9,780         | 38                  | 16,325,378              | NO                         | weir                          | -----                    | -----                  | 7,000                      | 228,354,975.48        |                  |
| Ferreras                               | RoR   | 2,434         | 4                   | 10,400,000              | NO                         | Transfer                      | -----                    | -----                  | 30,000                     | 61,528,348.40         |                  |
| Frómista (Esclusa 17, 18, 19 y 20)     | canal | 789           | 2                   | 2,367,000               | NO                         | canal                         | -----                    | -----                  | 306                        | 21,600,000.00         |                  |
| Fuentermosa o Fuentehermosa            | RoR   | 348           | 1                   | 1,008,667               | NO                         | weir                          | -----                    | -----                  | 600                        | 13,043,107.76         |                  |
| Garrido                                | RoR   | 128           | 2                   | 66,167                  | NO                         | Bodón de la Ibiensa Reservoir | Rep.                     | Rep.                   | 400                        | 3,766,556.48          |                  |
| Gormaz                                 | RoR   | 415           | 18                  | 608,096                 | NO                         | weir                          | -----                    | -----                  | 500                        | 94,950,893.49         |                  |
| Guma                                   | RoR   | 2,295         | 35                  | 7200000                 | NO                         | Small dam                     | 0.89                     | 188,050                | 3,000                      | 395,294,117.65        | 85,187           |

|                                    |     |       |     |            |    |                              |       |            |       |                  |            |
|------------------------------------|-----|-------|-----|------------|----|------------------------------|-------|------------|-------|------------------|------------|
| Herreros                           | RoR | 1,208 | 101 | 7,049,200  | NO | weir                         | ----- | -----      | 270   | 2,119,661,761.59 |            |
| Husillos                           | RoR | 329   | 15  | 924,000    | NO | weir                         | ----- | -----      | 550   | 151,659,574.47   |            |
| La Aurora                          | RoR | 656   | 25  | 1,284,904  | NO | weir                         | ----- | -----      | 331   | 176,282,560.98   |            |
| La Conchita                        | RoR | 848   | 36  | 2,229,852  | NO | weir                         | ----- | -----      | 97    | 340,788,701.89   |            |
| La Confianza                       | RoR | 640   | 6   | 796,004    | NO | Small dam                    | 12.40 | 4,380      | 284   | 26,865,135.00    | 1,353      |
| La Flecha                          | RoR | 984   | 85  | 8,045,099  | NO | Small dam                    | ----- | 20,140     | 55    | 2,501,829,567.07 | 5,518      |
| La Gila                            | RoR | 76    | 3   | 456,000    | NO | weir                         | ----- | -----      | 49    | 64,238,400.00    |            |
| La Güera                           | RoR | 132   | 4   | 224,462    | NO | weir                         | ----- | -----      | 223   | 24,486,763.64    |            |
| La Higuera                         | RoR | 580   | 17  | 1,445,051  | NO | weir                         | ----- | -----      | 337   | 152,477,795.17   |            |
| La Isla                            | RoR | 1,884 | 118 | 7,748,222  | NO | weir                         | ----- | -----      | 252   | 1,747,791,605.92 |            |
| La Josefina                        | RoR | 1,112 | 36  | 2,920,119  | NO | weir                         | ----- | -----      | 447   | 340,330,415.83   |            |
| La Lera                            | RoR | 408   | 15  | 1,581,679  | NO | weir                         | ----- | -----      | 1,087 | 209,339,867.65   |            |
| La Pelotera                        | RoR | 246   | 0   | 746,300    | NO | weir                         | ----- | -----      | 758   | 40,955.49        |            |
| La Peña o Villahoz                 | RoR | 432   | 11  | 1,173,200  | NO | weir                         | ----- | -----      | 200   | 111,454,000.00   |            |
| La Pola de Gordón                  | RoR | 425   | 11  | 704,822    | NO | weir                         | ----- | -----      | 172   | 64,478,774.96    |            |
| La Rachela                         | RoR | 290   | 4   | 930,900    | NO | weir                         | ----- | -----      | 625.6 | 46,224,000.00    |            |
| La Recorba                         | RoR | 432   | 12  | 25,415.65  | NO | Small dam                    | ----- | 200        | 40    | 2,541,565.00     | 86         |
| La Requejada                       | RHP | 4,217 | 10  | 13,621,339 | NO | La Requejada Reservoir       | 66.42 | 3,330,000  | 9,360 | 118,609,335.57   | 1,350,000  |
| La Ventosa                         | RoR | 110   | 7   | 0          | NO | weir                         | ----- | -----      | 829   | 34,821,818.00    |            |
| La Villa o Salto de la Villa       | RoR | 421   | 8   | 1,139,909  | NO | weir                         | ----- | -----      | 800   | 77,979,523.04    |            |
| Las Arenillas o Fuenrosario        | RoR | 76    | 4   | 547,500    | NO | weir                         | ----- | -----      | 121   | 114,110,526.32   |            |
| Las Once Paradas                   | RoR | 224   | 9   | 600,423    | NO | weir                         | ----- | -----      | 583   | 82,022,070.54    |            |
| Las Sorribas                       | RoR | 208   | 8   | 5,600,000  | NO | weir                         | ----- | -----      | 5,500 | 38,304,000.00    |            |
| Las Vencías                        | RHP | 2,400 | 15  | 1,840,335  | NO | Las vencías reservoir        | 9.00  | 580,000    | 5,200 | 41,407,537.50    | 610,000    |
| Ligüézana                          | RoR | 500   | 12  | 1,780,070  | NO | weir                         | ----- | -----      | 168   | 153,798,048.00   |            |
| Linares del Arroyo                 | RHP | 1,604 | 7   | 2,450,000  | NO | Linares del Arroyo Reservoir | 54.55 | 4,700,000  | 9,900 | 38,491,271.82    | 3,830,000  |
| Los Cotriles                       | RoR | 306   | 5   | 1,779,696  | NO | weir                         | ----- | -----      | 607   | 94,219,200.00    |            |
| Los Leones o Puente de los Leones  | RoR | 674   | 20  | 1,186,384  | NO | weir                         | ----- | -----      | 10    | 126,735,382.79   |            |
| Los Molinos del Soto o Los Molinos | RoR | 733   | 9   | 4,300,000  | NO | weir                         | ----- | -----      | 1,000 | 185,844,474.76   |            |
| Los Rábanos                        | RHP | 4,480 | 30  | 4,800,435  | NO | Los Rábanos Reservoir        | 6.40  | 920,000    | 6,836 | 115,724,772.32   | 750,000    |
| Lubián I o Salto de Lubián         | RoR | 1,070 | 3   | 2,025,860  | NO | canal                        | ----- | -----      | 1,464 | 20,938,683.10    |            |
| Lugán                              | RoR | 846   | 5   | 2,951,173  | NO | weir                         | ----- | -----      | 3,050 | 62,790,914.89    |            |
| Maire                              | RoR | 430   | 12  | 1,696,390  | NO | weir                         | ----- | -----      | 3,565 | 170,428,018.60   |            |
| Matallana de Torio o Torio I       | RoR | 1,520 | 12  | 2,680,845  | NO | Small dam                    | 0.50  | -----      | 1,233 | 76,192,436.84    |            |
| Matazorita                         | RoR | 210   | 6   | 1,256,059  | NO | weir                         | ----- | -----      | 1,233 | 129,194,640.00   |            |
| Molinaferrera                      | RoR | 1,244 | 1   | 2,043,174  | NO | weir                         | ----- | -----      | 1,100 | 7,390,902.73     |            |
| Molino de Andrés                   | RoR | 3,750 | 22  | 4,046,280  | NO | Small dam                    | 0.84  | 114,200    | 56    | 85,457,433.60    | 62,239     |
| Molino de Getino                   | RoR | 107   | 4   | 332,388    | NO | weir                         | ----- | -----      | 67    | 44,732,590.65    |            |
| Molino de Las Huertas              | RoR | 330   | 20  | 1,221,935  | NO | weir                         | ----- | -----      | 932   | 266,604,000.00   |            |
| Molino del Batán o Los Batanes     | RoR | 220   | 3   | 269,459    | NO | weir                         | ----- | -----      | 156   | 13,227,987.27    |            |
| Molino del Puente                  | RoR | 404   | 20  | 1,453,139  | NO | weir                         | ----- | -----      | 510   | 258,975,267.33   |            |
| Molino El Berral o El Berral       | RoR | 148   | 2   | 239,710    | NO | weir                         | ----- | -----      | 806.8 | 9,399,223.46     |            |
| Molino Rica Posada                 | RoR | 8     | 1   | 24,000     | NO | weir                         | ----- | -----      | 273   | 5,918,400.00     |            |
| Molino San Andrés                  | RoR | 33    | 1   | 111,355    | NO | weir                         | ----- | -----      | 2942  | 10,896,592.91    |            |
| Molinos de Castilla                | RoR | 1,872 | 32  | 4,997,734  | NO | weir                         | ----- | -----      | 172   | 309,378,956.65   |            |
| Monasterio                         | RoR | 1,366 | 40  | 3,240,110  | NO | weir                         | ----- | -----      | 20    | 341,563,572.47   |            |
| Morla                              | RoR | 188   | 2   | 575,612    | NO | small dam                    | ----- | 9,600      | 2,000 | 22,044,714.89    | 4,147      |
| Navapalos                          | RoR | 542   | 20  | 2,244,958  | NO | small dam                    | ----- | 37,000     | 507.5 | 298,223,202.95   | 17,797     |
| Nuestra Señora de las Mercedes     | RoR | 2,020 | 70  | 7,296,723  | NO | small dam                    | 0.06  | 135,750    | 1,100 | 910,284,255.45   | 46,698     |
| Peña Corada                        | RoR | 4,990 | 63  | 14,389,836 | NO | small dam                    | ----- | 28,000,000 | 1270  | 652,992,878.53   | 10,136,000 |
| Pereruela                          | RoR | 3,160 | 75  | 11,788,000 | NO | San Román Reservoir          | 1.50  | 1,250,000  | 3,853 | 1,007,202,531.65 | 1,250,000  |
